# Supplementary material
Source: publisher figshare collection journal article supplement (https://tandf.figshare.com/ndownloader/files/36009831)

## Supplementary appendix 7

Chondrite normalised REE patterns for garnet from (a) KT7B and (b) KT9B. Inset shows the BSE image of garnet

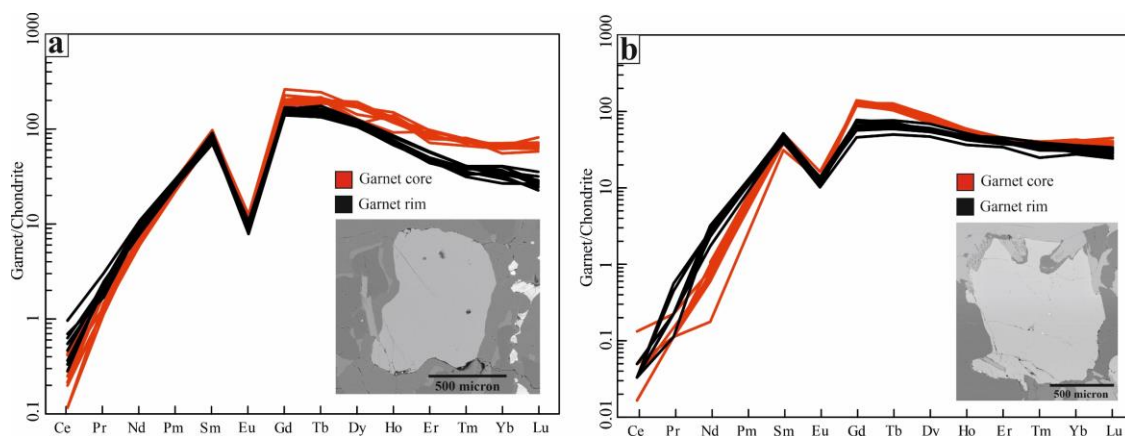

$\log (D_{Yb}/D_{Gd})$  vs.  $\log (D_{Yb})$  plot for individual zircons from KT7B and KT9B against (a) garnet core and (b) garnet rim compositions

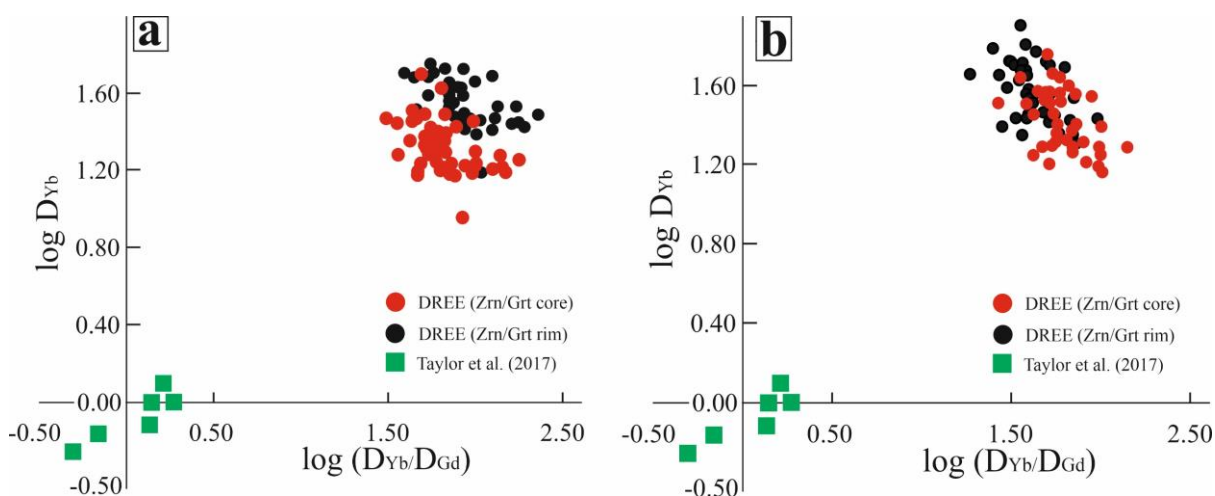

Calculated partitioning coefficient between monazite and garnet compared with available partition coefficients values of natural garnet-monazite pairs.

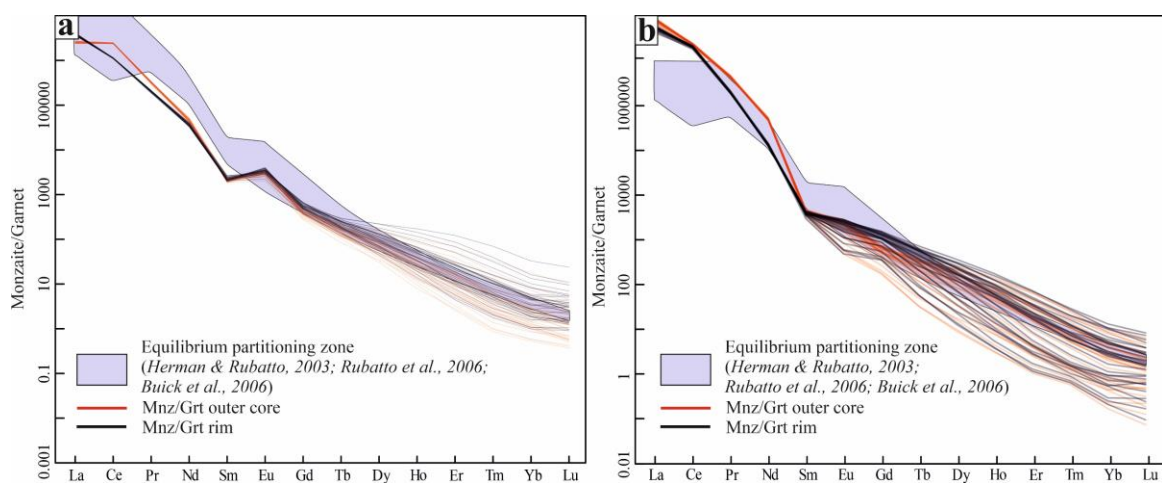

Supplement: Supplementary file 1 [file 36009831]
